# Supplementary material for: Fe2O3/NiO nanocomposites: synthesis, characterization and roxarsone sensing by Fourier transform infrared photoacoustic spectroscopy
Source: Royal Society of Chemistry journal article supplement (doi:10.1039/d3nj01178j), 2023-01-01
Supplement: d3nj01178j1.pdf [file d3nj01178j1.pdf]

## SUPPLEMENTARY INFORMATION

### Fe<sub>2</sub>O<sub>3</sub>/NiO nanocomposite: Synthesis, characterization and roxarsone sensing by

#### Fourier transform infrared photoacoustic spectroscopy

R. Suresh<sup>1,2,3\*</sup>, Ángela Álvarez<sup>1,4</sup>, Claudio Sandoval<sup>1</sup>, Eimmy Ramírez<sup>1</sup>, Paola Santander<sup>5</sup>,  
R.V. Mangalaraja<sup>6</sup>, Jorge Yáñez<sup>1\*</sup>

<sup>1</sup>Department of Analytical and Inorganic Chemistry, Faculty of Chemistry, University of Concepcion, Concepción, Chile.

<sup>2</sup>Department of Chemistry, Karpagam Academy of Higher Education, Coimbatore, Tamil Nadu, India

<sup>3</sup>Centre for Material Chemistry, Karpagam Academy of Higher Education, Coimbatore, Tamil Nadu, India

<sup>4</sup>Department of Chemistry and Biology, Basic Sciences Division, Universidad del Norte, Barranquilla 081007, Colombia

<sup>5</sup>Departamento de Ciencias del Ambiente, Facultad de Química y Biología, Universidad de Santiago de Chile

<sup>6</sup>Faculty of Engineering and Sciences, Adolfo Ibanez University, Diagonal las Torres 2640, Penalolén, Santiago, Chile

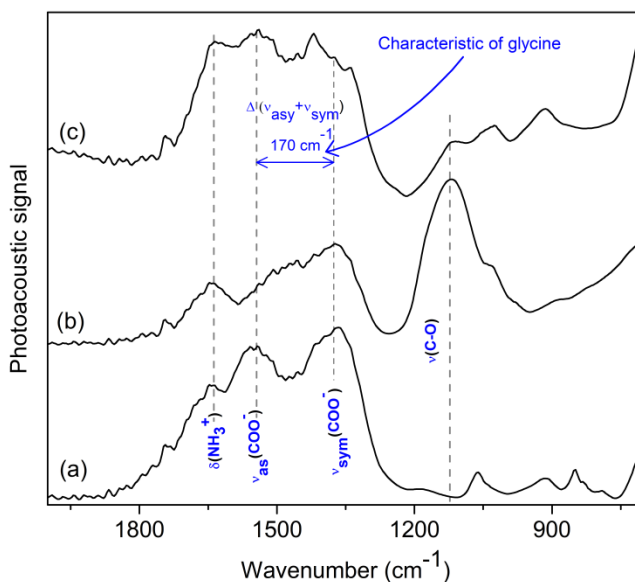

**Fig. S1:** FTIR-PA spectrum of (a) Fe<sub>2</sub>O<sub>3</sub>, (b) NiO and (c) Fe<sub>2</sub>O<sub>3</sub>/NiO nanocomposite in the range of 2000 to 700 cm<sup>-1</sup>.

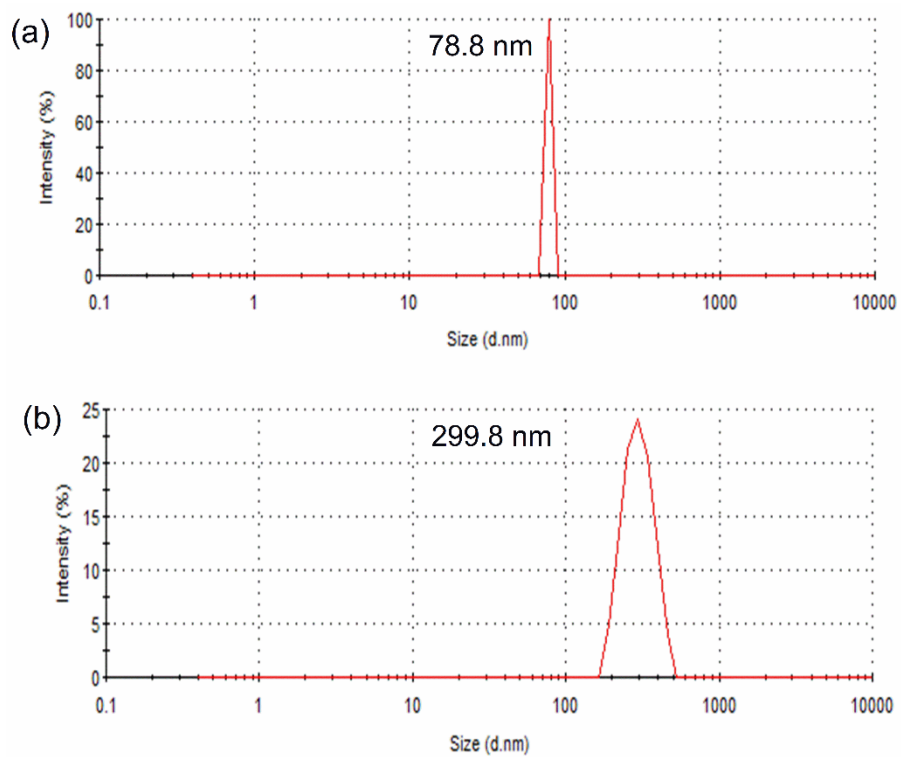

**Fig. S2:** Particle size distribution curve of (a) Fe<sub>2</sub>O<sub>3</sub>, and (b) NiO nanoparticles, prepared by glycine aided synthesis (450 °C, 4 h).

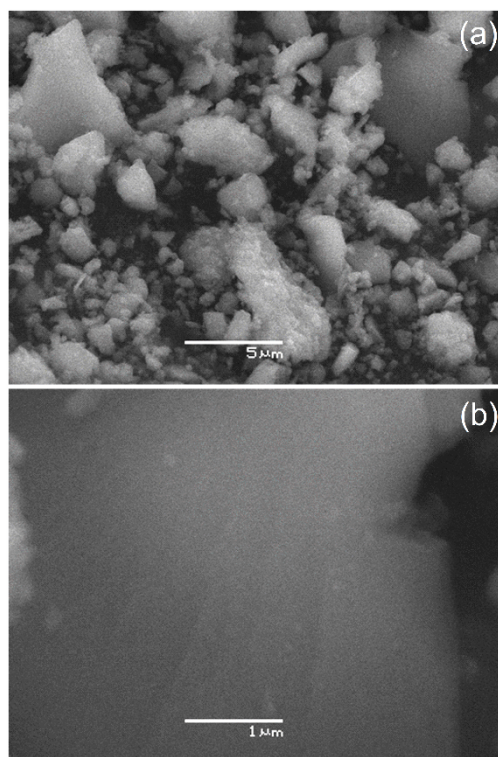

**Fig. S3:** SEM images of  $\text{Fe}(\text{OH})_3$

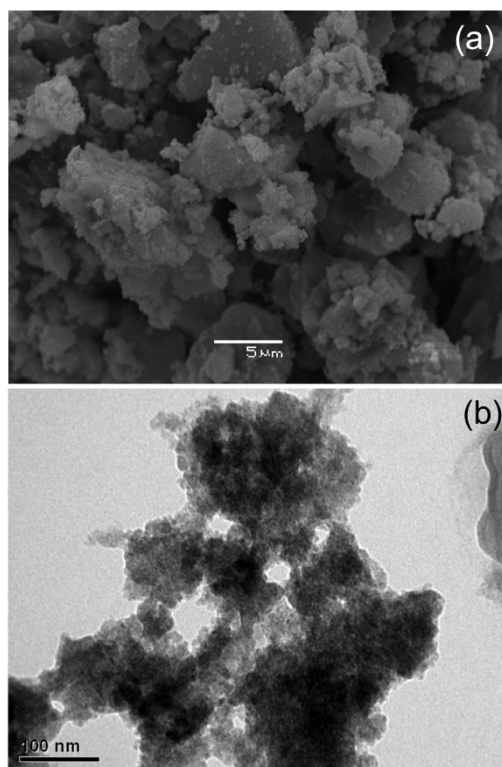

**Fig. S4:** (a) SEM and (b) TEM image of  $\text{Ni}(\text{OH})_2$

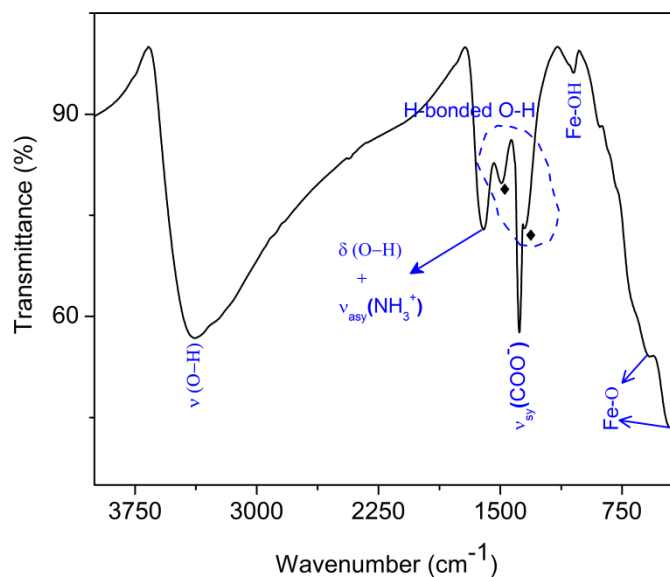

**Fig. S5:** FTIR spectrum of  $\text{Fe}(\text{OH})_3$

The FT-IR spectrum of  $\text{Fe}(\text{OH})_3$  shows broad band in the region of  $3650\text{-}3000\text{ cm}^{-1}$  which is due to O-H stretching vibrations. The asymmetric stretching of  $\text{NH}_3^+$  and deformation vibration of OH bond was observed as  $1602\text{ cm}^{-1}$ . The bands at  $1482$  and  $1336\text{ cm}^{-1}$  could be assigned to bending vibrations of  $\text{NH}_3^+$  and  $\text{CH}_2$  wagging vibration respectively [1]. The vibration of OH group in Fe-OH is observed at  $1037\text{ cm}^{-1}$  [2]. The bands at  $591$  and  $454\text{ cm}^{-1}$  are assigned to stretching vibration of Fe-O bond.

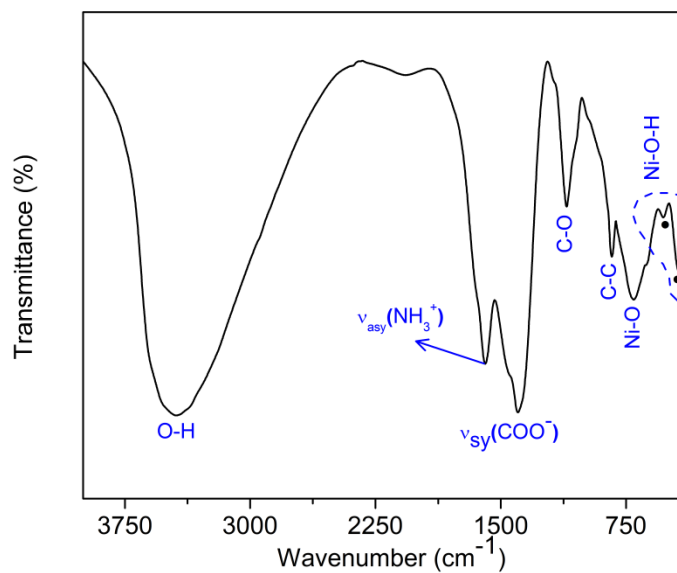

**Fig. S6:** FTIR spectrum of Ni(OH)<sub>2</sub>

The broad band at 3443 cm<sup>-1</sup> is corresponding to O-H stretching vibration. The asymmetric vibration of NH<sub>3</sub><sup>+</sup> is observed at 1592 cm<sup>-1</sup>. The bands at 1402 and 1108 cm<sup>-1</sup> are attributed to vibrations of carboxylate and C-O bond. The band at 827 cm<sup>-1</sup> is due to C-C bending vibration [3]. The bands at 706 cm<sup>-1</sup> is due to Ni-O bond [4]. The vibrations due related to Ni-O-H are observed at 537 and 413 cm<sup>-1</sup> [5].

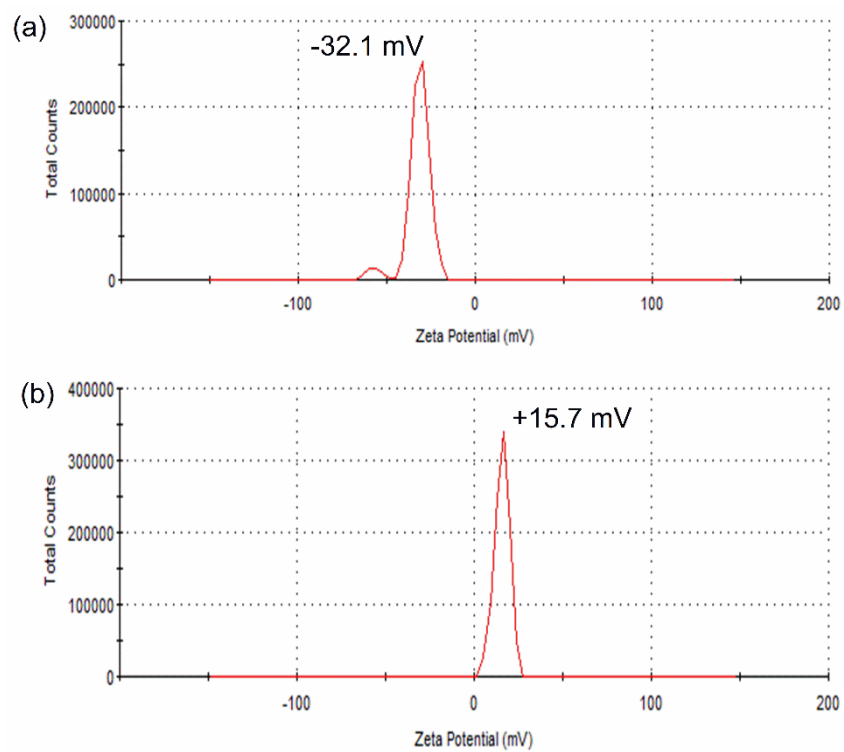

**Fig. S7:** Zeta potential curve of (a) Fe<sub>2</sub>O<sub>3</sub>, and (b) NiO nanoparticles, prepared by the glycine aided synthesis method (450 °C, 4 h).

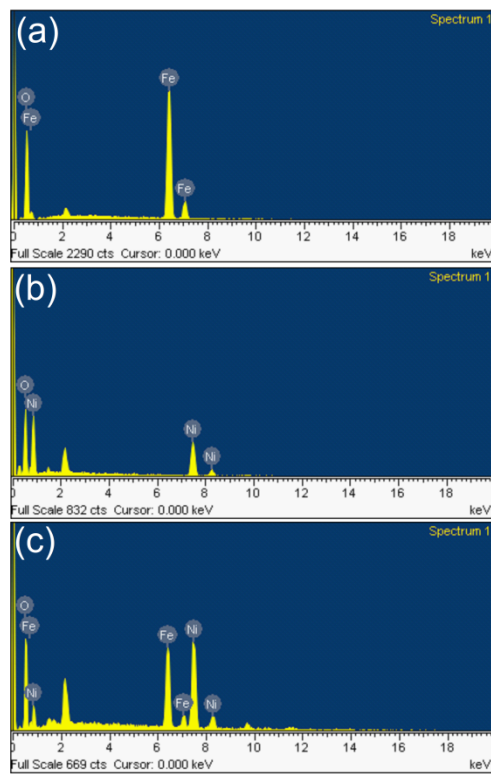

**Fig. S8:** EDS spectra of (a) Fe<sub>2</sub>O<sub>3</sub>, (b) NiO and (c) Fe<sub>2</sub>O<sub>3</sub>/NiO nanocomposite



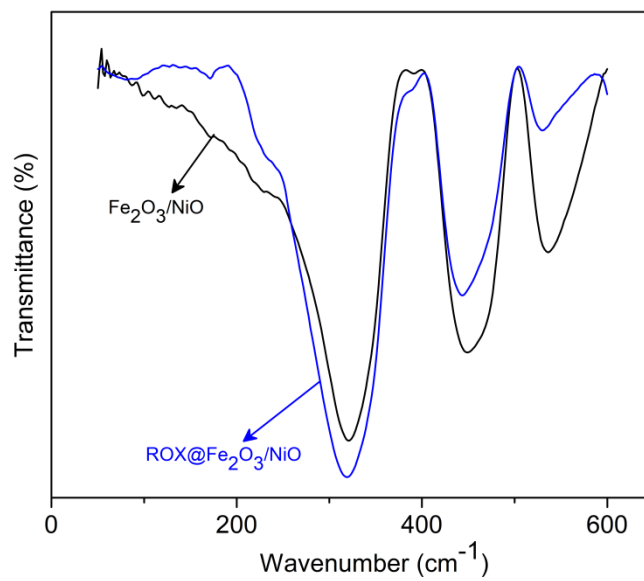

**Fig. S9:** Far FTIR spectra of (a) Fe<sub>2</sub>O<sub>3</sub>/NiO and (b) ROX adsorbed Fe<sub>2</sub>O<sub>3</sub>/NiO nanocomposite

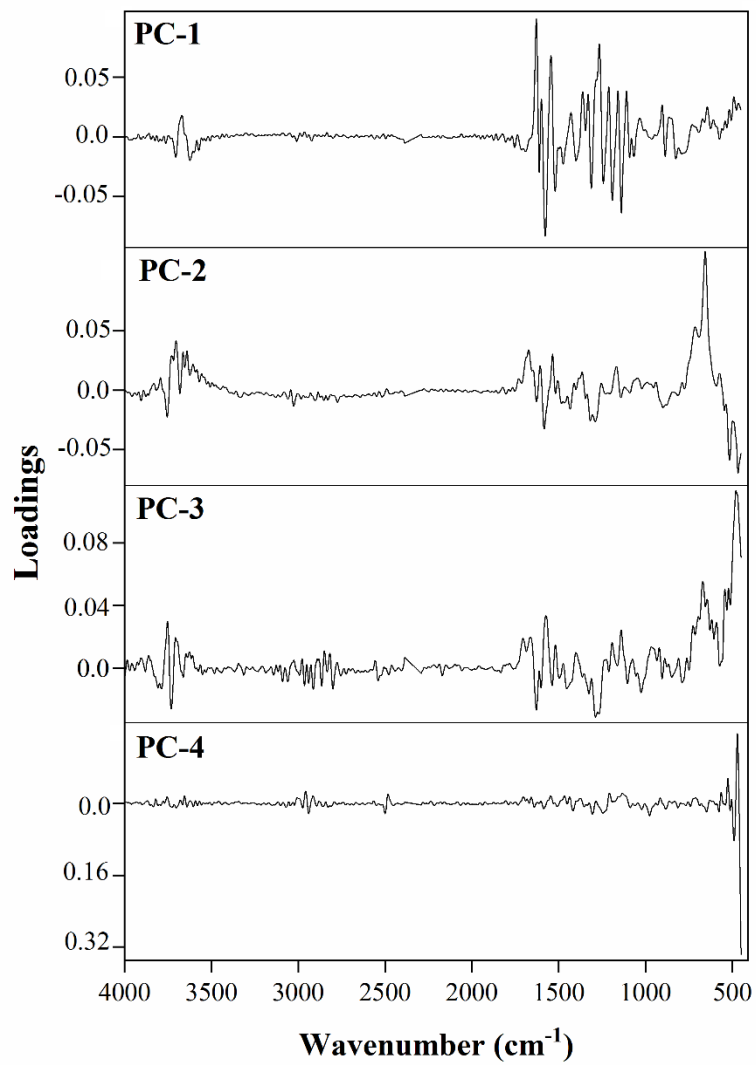

**Fig. S10:** Loading plots for the first four PCs

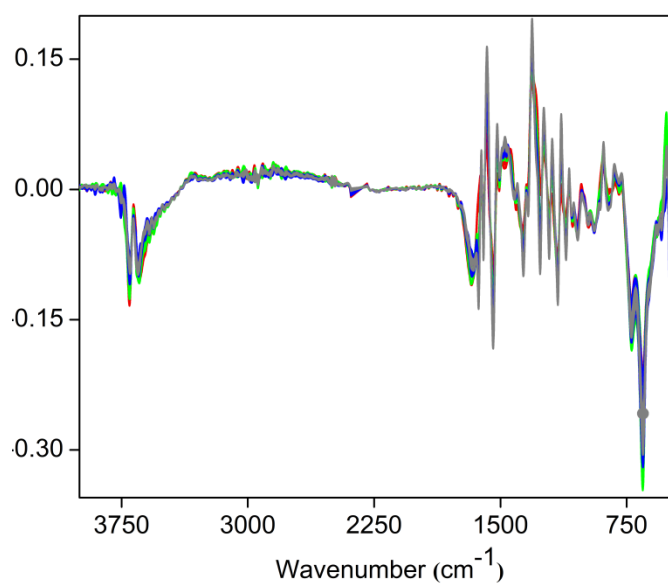

**Fig. S11.** First derivative FTIR-PA spectra of 10 mg L<sup>-1</sup> (red), 20 mg L<sup>-1</sup> (green), 30 mg L<sup>-1</sup> (blue) and 40 mg L<sup>-1</sup> (gray) ROX adsorbed Fe<sub>2</sub>O<sub>3</sub>/NiO nanocomposites

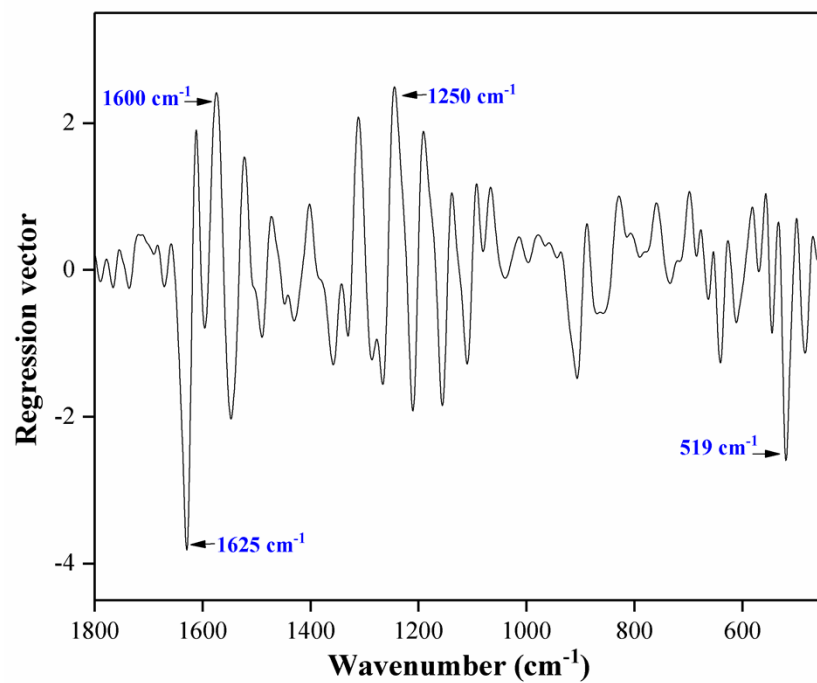

**Fig. S12:** Regression vector in the PLS model

**Table S1**

Significant factor analysis of the four concentration ROX analyzed by FTIR-PAS

| Range spectral (cm <sup>-1</sup> ) | Components | Absolute variance | Percentage variance (%) | Cumulative variance (%) | Press Cal |
|------------------------------------|------------|-------------------|-------------------------|-------------------------|-----------|
| 4000-450                           | PC 1       | 6.9               | 44.1                    | 44.1                    | 8.7       |
|                                    | PC 2       | 4.0               | 25.7                    | 69.9                    | 4.7       |
|                                    | PC 3       | 1.4               | 9.3                     | 79.1                    | 3.3       |
|                                    | PC 4       | 0.5               | 3.4                     | 82.5                    | 2.7       |
| 1800-450                           | PC 1       | 6.7               | 47.9                    | 47.9                    | 7.3       |
|                                    | PC 2       | 3.5               | 24.9                    | 72.8                    | 3.8       |
|                                    | PC 3       | 1.4               | 9.8                     | 82.6                    | 2.4       |
|                                    | PC 4       | 0.5               | 3.6                     | 86.3                    | 1.9       |

**Table S2**

Summary of PLS parameters in training and testing sets.

|                   |                         | <i>Training set</i> |      |
|-------------------|-------------------------|---------------------|------|
| PLS<br>parameters | n                       |                     | 40   |
|                   | Validation              | Cross validation    | LOO  |
|                   | Latent variables        |                     | 4    |
|                   | Cumulative variance (%) |                     | 84.5 |
|                   | RMSEC                   |                     | 1.31 |
|                   | R <sup>2</sup> Cal      |                     | 0.99 |
|                   | RMSECV                  |                     | 1.81 |
|                   | R <sup>2</sup> Val      |                     | 0.99 |
|                   |                         | <i>Testing set</i>  |      |
|                   | n                       |                     | 19   |
|                   | Validation              | External validation |      |
|                   | Latent variables        |                     | 4    |
|                   | RSEP                    |                     | 1.42 |
|                   | R <sup>2</sup>          |                     | 0.99 |

## References

1. N.C. Feitoza, T.D. Goncalves, J.J. Mesquita, J.S. Menegucci, M.K.M.S. Santos, J.A. Chaker, R.B. Cunha, A.M.M. Medeiros, J.C. Rubim and M.H. Sousa, *J. Hazard. Mater.* 2014, **264**, 153–160.
2. X. Yang, Y. Li, H. Gao, C. Wang, X. Zhang and H. Zhou, *Int. J. Biol. Macromol.* 2018, **117**, 30–41.
3. G. Fischer, X. Cao, N. Cox and M. Francis, *Chem. Phys.* 2005, **313**, 39–49.
4. M. Rajamathi, P.V. Kamath and R. Seshadri, *J. Mater. Chem.* 2000, **10**, 503-506.
5. S. Krehula, M. Ristic, C. Wu, X. Li, L. Jiang, J. Wang, G. Sun, T. Zhang, M. Perovic, M. Boskovic, B. Antic, L.K. Krehula, B. Kobzi, S. Kubuki and S. Music, *J. Alloys Compd.* 2018, **750**, 687-695.
